# Supplementary material for: Simultaneous determination of lesinurad and co-administered drugs used in management of gout comorbidities to uncover potential pharmacokinetic interaction in rat plasma
Source: Springer Nature journal article supplement (doi:10.1038/s41598-025-93680-4), 2025-04-02
Supplement: MOESM1 [file 41598_2025_93680_MOESM1_ESM.pdf]

## Supporting Information

### Simultaneous determination of lesinurad and co-administered drugs used in management of gout comorbidities to uncover potential pharmacokinetic interaction in rat plasma.

Hadeel A. Khalil<sup>1</sup>, Amira F. El-Yazbi<sup>\*1</sup>, Eman I. El-Kimary<sup>1</sup>, Mohamed A. Elrewiny<sup>2</sup>, Ahmed F. El-Yazbi<sup>2,3</sup>, Tarek S. Belal<sup>1</sup>.

<sup>1</sup> Pharmaceutical Analytical Chemistry Department, Faculty of Pharmacy, Alexandria University, Alexandria 21521, Egypt

<sup>2</sup> Faculty of Pharmacy and the Research & Innovation Hub, Alamein International University, Alamein 51718, Egypt

<sup>3</sup> Department of Pharmacology and Toxicology, Faculty of Pharmacy, Alexandria University, Alexandria 21521, Egypt

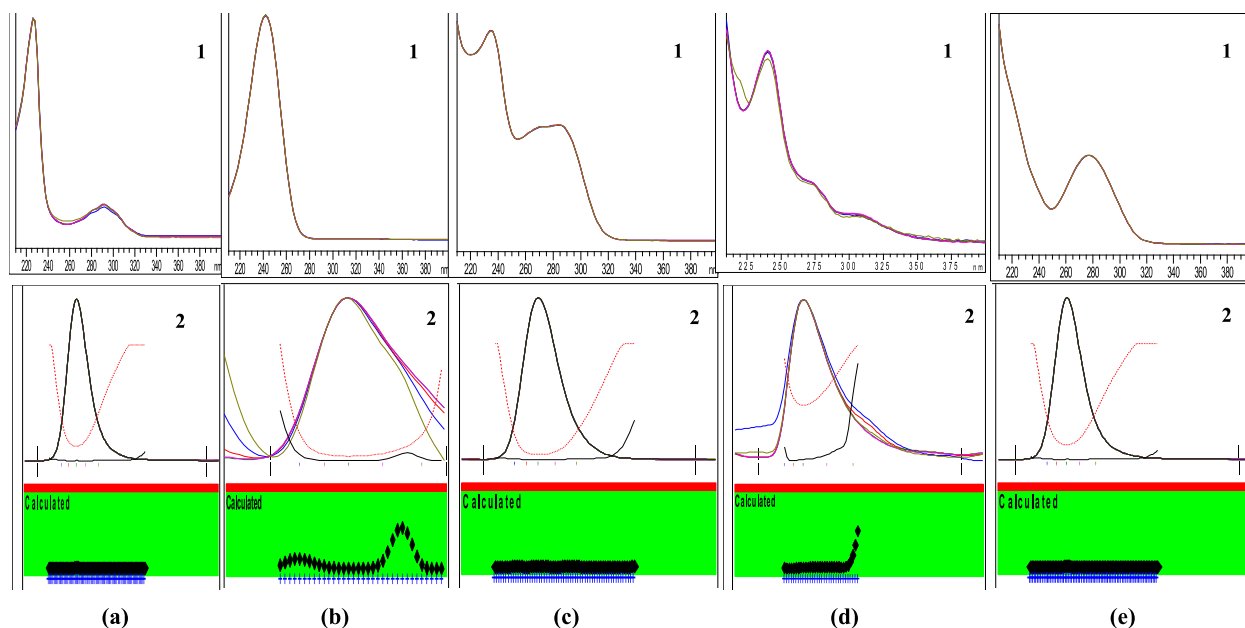

**S 1.** Superimposed Spectra (1) and similarity curves (2) illustrating peak purity of LES(a), EPL(b), ETC(c), AMD(d) and the internal standard DIC(e) obtained from rat plasma.
